# Supplementary material for: Design and structural characterization of the all-metal aromatic sandwich species [Bi3Au3Bi3]3−: insight from density functional theory
Source: Royal Society of Chemistry journal article supplement (doi:10.1039/c6nj02761j), 2017-01-01
Supplement: c6nj02761j1.pdf [file c6nj02761j1.pdf]

## Supporting Information

11/20/2016

### Design and Structural Characterization of all-metal aromaticity sandwich species $[\text{Bi}_3\text{Au}_3\text{Bi}_3]^{3-}$ : Insight from density functional theory

Li-Hong Tang,<sup>a</sup> Ting-Ting Zhu,<sup>a</sup> Ping Ning,<sup>a</sup> Kai Li,<sup>a\*</sup> Shuang-You Bao,<sup>a</sup> Xu Jin,<sup>a</sup> and Xiu-Ying Zhang<sup>a</sup>

This paper we wish to be considered for publication in *New Journal of Chemistry*.

#### Table of contents:

The complete results of CDA analysis

Table S1

**Table S1.** The complete results of CDA analysis

| Orbital | Occ.     | d         | b         | d - b     | r         |
|---------|----------|-----------|-----------|-----------|-----------|
| 1       | 2.000000 | 0.000494  | 0.000000  | 0.000494  | 0.000614  |
| 2       | 2.000000 | 0.000362  | -0.000007 | 0.000369  | 0.000511  |
| 3       | 2.000000 | 0.000397  | -0.000004 | 0.000401  | 0.000056  |
| 4       | 2.000000 | 0.000513  | 0.000005  | 0.000508  | 0.000055  |
| 5       | 2.000000 | 0.000395  | -0.000001 | 0.000396  | 0.000050  |
| 6       | 2.000000 | 0.000513  | 0.000003  | 0.000510  | 0.000059  |
| 7       | 2.000000 | -0.000003 | -0.000392 | 0.000388  | -0.000775 |
| 8       | 2.000000 | -0.000002 | -0.000595 | 0.000593  | -0.000113 |
| 9       | 2.000000 | -0.000004 | -0.000311 | 0.000307  | -0.000683 |
| 10      | 2.000000 | -0.000057 | -0.000000 | -0.000057 | -0.000011 |
| 11      | 2.000000 | -0.000021 | -0.000000 | -0.000021 | 0.000008  |
| 12      | 2.000000 | -0.000088 | -0.000002 | -0.000086 | -0.000045 |
| 13      | 2.000000 | -0.000088 | -0.000001 | -0.000086 | -0.000046 |
| 14      | 2.000000 | -0.000063 | -0.000001 | -0.000063 | 0.000013  |
| 15      | 2.000000 | -0.000065 | -0.000001 | -0.000064 | 0.000013  |
| 16      | 2.000000 | -0.000029 | 0.000000  | -0.000029 | -0.000013 |
| 17      | 2.000000 | -0.000006 | -0.000000 | -0.000006 | 0.000009  |
| 18      | 2.000000 | -0.000028 | 0.000000  | -0.000028 | -0.000013 |
| 19      | 2.000000 | -0.000006 | -0.000000 | -0.000006 | 0.000009  |
| 20      | 2.000000 | -0.000050 | -0.000000 | -0.000049 | -0.000023 |
| 21      | 2.000000 | -0.000004 | -0.000000 | -0.000004 | 0.000018  |
| 22      | 2.000000 | -0.000091 | 0.000002  | -0.000093 | -0.000124 |
| 23      | 2.000000 | -0.000443 | -0.000012 | -0.000430 | -0.000637 |

---

|    |          |           |           |           |           |
|----|----------|-----------|-----------|-----------|-----------|
| 24 | 2.000000 | -0.000097 | -0.000002 | -0.000095 | 0.000025  |
| 25 | 2.000000 | -0.000937 | -0.000009 | -0.000928 | -0.000198 |
| 26 | 2.000000 | -0.000097 | -0.000000 | -0.000097 | 0.000020  |
| 27 | 2.000000 | -0.000954 | -0.000012 | -0.000942 | -0.000190 |
| 28 | 2.000000 | -0.000010 | 0.000976  | -0.000986 | 0.001631  |
| 29 | 2.000000 | -0.000014 | 0.001691  | -0.001705 | 0.00593   |
| 30 | 2.000000 | -0.000026 | 0.001052  | -0.001078 | 0.001871  |
| 31 | 2.000000 | -0.000013 | -0.000100 | 0.000086  | -0.000273 |
| 32 | 2.000000 | -0.000001 | 0.000139  | -0.000140 | 0.000012  |
| 33 | 2.000000 | -0.000002 | 0.000130  | -0.000132 | 0.000030  |
| 34 | 2.000000 | -0.000000 | 0.000035  | -0.000035 | -0.000012 |
| 35 | 2.000000 | -0.000000 | 0.000039  | -0.000040 | -0.000023 |
| 36 | 2.000000 | -0.000000 | 0.000164  | -0.000164 | 0.000004  |
| 37 | 2.000000 | 0.000064  | 0.000004  | 0.000061  | 0.000212  |
| 38 | 2.000000 | 0.000056  | -0.000001 | 0.000057  | -0.000087 |
| 39 | 2.000000 | 0.000044  | 0.000003  | 0.000041  | 0.000105  |
| 40 | 2.000000 | 0.000044  | 0.000001  | 0.000043  | 0.000108  |
| 41 | 2.000000 | 0.000022  | -0.000003 | 0.000025  | -0.000033 |
| 42 | 2.000000 | 0.000022  | -0.000001 | 0.000024  | -0.000036 |
| 43 | 2.000000 | -0.000148 | 0.000001  | -0.000149 | 0.000390  |
| 44 | 2.000000 | -0.000080 | 0.000005  | -0.000086 | 0.000325  |
| 45 | 2.000000 | 0.000007  | 0.000000  | 0.000006  | 0.000038  |
| 46 | 2.000000 | 0.000006  | -0.000000 | 0.000007  | 0.000012  |
| 47 | 2.000000 | 0.000007  | 0.000000  | 0.000007  | 0.000039  |
| 48 | 2.000000 | 0.000006  | 0.000000  | 0.000006  | 0.000011  |
| 49 | 2.000000 | 0.000402  | 0.000009  | 0.000393  | 0.002056  |
| 50 | 2.000000 | 0.000330  | 0.000000  | 0.000330  | -0.000354 |
| 51 | 2.000000 | -0.000077 | 0.000003  | -0.000080 | 0.000382  |
| 52 | 2.000000 | -0.000076 | 0.000004  | -0.000080 | 0.000382  |
| 53 | 2.000000 | -0.000039 | 0.000002  | -0.000041 | 0.000222  |
| 54 | 2.000000 | -0.000038 | 0.000001  | -0.000039 | 0.000224  |
| 55 | 2.000000 | 0.000003  | 0.000000  | 0.000003  | 0.000070  |
| 56 | 2.000000 | -0.000014 | 0.000001  | -0.000014 | 0.000037  |
| 57 | 2.000000 | -0.000027 | 0.000007  | -0.000034 | 0.000349  |
| 58 | 2.000000 | 0.000111  | -0.000008 | 0.000119  | 0.000621  |
| 59 | 2.000000 | -0.000028 | 0.000003  | -0.000031 | 0.000354  |
| 60 | 2.000000 | 0.000116  | -0.000000 | 0.000116  | 0.000633  |
| 61 | 2.000000 | 0.000391  | 0.000006  | 0.000385  | 0.001600  |
| 62 | 2.000000 | 0.000371  | 0.000030  | 0.000341  | 0.001525  |
| 63 | 2.000000 | 0.000003  | 0.000003  | -0.000000 | 0.000310  |
| 64 | 2.000000 | -0.000011 | 0.000000  | -0.000011 | 0.000089  |
| 65 | 2.000000 | 0.000444  | -0.000045 | 0.000489  | -0.000538 |
| 66 | 2.000000 | 0.000458  | -0.000003 | 0.000461  | -0.000621 |
| 67 | 2.000000 | -0.004256 | -0.001431 | -0.002825 | 0.101278  |

---

---

|     |          |           |           |           |           |
|-----|----------|-----------|-----------|-----------|-----------|
| 68  | 2.000000 | -0.014177 | 0.000303  | -0.014480 | 0.021274  |
| 69  | 2.000000 | 0.020427  | -0.001150 | 0.021577  | 0.065290  |
| 70  | 2.000000 | 0.019808  | 0.000137  | 0.019671  | 0.062713  |
| 71  | 2.000000 | 0.001284  | 0.000071  | 0.001213  | -0.010213 |
| 72  | 2.000000 | 0.000915  | -0.000876 | 0.001791  | -0.008308 |
| 73  | 2.000000 | 0.010506  | 0.010401  | 0.000105  | 0.093579  |
| 74  | 2.000000 | 0.001963  | 0.008377  | -0.006414 | 0.077167  |
| 75  | 2.000000 | -0.002151 | -0.008781 | 0.006630  | 0.035387  |
| 76  | 2.000000 | -0.000025 | 0.007956  | -0.007981 | 0.060570  |
| 77  | 2.000000 | 0.000046  | 0.008550  | -0.008504 | 0.059382  |
| 78  | 2.000000 | 0.006566  | 0.016636  | -0.010069 | 0.001963  |
| 79  | 2.000000 | 0.007565  | 0.043722  | -0.036157 | -0.052203 |
| 80  | 2.000000 | -0.002950 | 0.029663  | -0.032613 | -0.043703 |
| 81  | 2.000000 | 0.000624  | -0.003231 | 0.003854  | 0.022095  |
| 82  | 2.000000 | -0.000008 | 0.018257  | -0.018265 | -0.002585 |
| 83  | 2.000000 | 0.000256  | 0.017453  | -0.017197 | -0.001804 |
| 84  | 2.000000 | 0.000811  | 0.019519  | -0.018708 | -0.005922 |
| 85  | 2.000000 | -0.001709 | -0.008545 | 0.006836  | 0.043960  |
| 86  | 2.000000 | -0.001266 | 0.001040  | -0.002306 | -0.000557 |
| 87  | 2.000000 | -0.000924 | -0.000155 | -0.000769 | 0.001830  |
| 88  | .000000  | 0.000002  | 0.002381  | -0.002378 | -0.000108 |
| 89  | 2.000000 | 0.003753  | -0.009643 | 0.013397  | -0.009479 |
| 90  | 2.000000 | 0.003828  | 0.002160  | 0.001668  | -0.054325 |
| 91  | 2.000000 | -0.011252 | -0.027586 | 0.016334  | -0.347405 |
| 92  | 2.000000 | 0.009484  | 0.003108  | 0.006376  | 0.043627  |
| 93  | 2.000000 | 0.007994  | 0.000920  | 0.007074  | 0.047995  |
| 94  | 2.000000 | -0.005040 | 0.094944  | -0.099983 | -0.032456 |
| 95  | 2.000000 | 0.018768  | -0.008263 | 0.027031  | 0.173973  |
| 96  | 2.000000 | 0.009271  | 0.000098  | 0.009173  | -0.165619 |
| 97  | 2.000000 | 0.010456  | 0.000136  | 0.010319  | -0.165687 |
| 98  | 2.000000 | 0.001034  | -0.276471 | 0.277505  | -0.008006 |
| 99  | 2.000000 | 0.190247  | 0.002783  | 0.187464  | -0.566505 |
| sum | 198      | 0.283695  | -0.054713 | 0.338408  | -0.551957 |

---
